# Supplementary material
Source: PubMed Central journal article supplement (PMC2564291)
Supplement: NIHMS44739-supplement-S_data.pdf [file NIHMS44739-supplement-S_data.pdf]

## Supplemental data

### Files in this Data Supplement:

- [supplemental material](#) - S3. Table Summarizing the Memory Deficits and Emotional Alterations in BACE1 Knockout Mice.
- [supplemental material](#) - S1. The effect of strain background on Morris water maze performance in 16-18 month-old mice. Distance to reach the hidden platform in A. Non-transgenic (NTG, females represent 47%) and APP<sup>swe</sup>/PS1<sup>dE9</sup> double transgenic mice (females 40%) on congenic C57B6 background. B. NTG (females 40%) and APP<sup>swe</sup>/PS1<sup>dE9</sup> (females 57%) mice on F2 C57B6/129sv background. An analysis of the effect of strain background in a three-way ANOVA (background x genotype x day) yielded significance for the effects of strain background ( $F(1,70)=18.52$ ,  $p<0.0001$ ), genotype ( $F(1,70)=46.11$ ,  $p<0.0001$ ), day of training ( $F(3,210)=117.04$ ,  $p<0.0001$ ) and for genotype by day interaction ( $F(3,210)=12.38$ ,  $p<0.0001$ ). Importantly, strain background by genotype interaction was not significant ( $F(1,70)=0.45$ ,  $p>0.51$ ) indicating that hybrid genetic background used in our study of 16-18 mo-old mice did not significantly affect our ability to detect genotype-related differences.
- [supplemental material](#) - S2. The effect of strain background on Morris water maze performance in 16-18 month-old mice. One of the well-known behavioral characteristics of 129sv strain that may affect the performance in the Morris Water maze is a relatively high floating time (Wolfer, Lipp, 1997). We compared Time spent floating in our cohorts of F2 C57B6/129sv mice. To test whether the genotypes used in our study differ in this behavior. Suppl. Fig. 2 shows an average floating time (%) in consecutive days of training in the Morris Water maze (hidden platform version). The same mice as in Suppl. Fig. 1 are shown plus groups of age-matched BACE1<sup>-/-</sup> (females 36%), APP<sup>swe</sup>/PS1<sup>dE9</sup>/BACE1<sup>-/-</sup> (females 50%) and APP<sup>swe</sup>/PS1<sup>dE9</sup>/BACE1<sup>+/-</sup> (females 41%). Two-way (genotype x day) ANOVA for time spent floating during probe trials revealed no significant effect of genotype ( $F(4,63)=0.49$ ,  $p>0.62$ ) or genotype by day interaction ( $F(12,189)=1.01$ ,  $p>0.21$ ). As shown in Suppl. Fig. 2, mice of different genotypes spent similar time floating. There were no significant differences between genotypes in another behavioral trait of 129sv mice, time spent in proximity to the wall (Thigmotaxis, data not shown). These data indicate that effects of 129sv alleles on behavioral phenotypes appeared to be well balanced between different subgroups.
- [supplemental material](#) - S4. Absence of A $\beta$  and APP  $\beta$ -CTF Generation in Brains of APP<sup>swe</sup>;PS1<sup>dE9</sup> Mice lacking BACE1. Protein extracts from brains of littermate APP<sup>swe</sup>;PS1<sup>dE9</sup>;BACE1<sup>+/+</sup>, APP<sup>swe</sup>;PS1<sup>dE9</sup>;BACE1<sup>+/-</sup>, and APP<sup>swe</sup>;PS1<sup>dE9</sup>;BACE1<sup>-/-</sup> mice were subjected to: (A) immunoblot analysis (50  $\mu$ g each) with antisera against APP, APP-CTF, BACE1, PS1, and actin; note that APP  $\beta$ -CTF was detected in APP<sup>swe</sup>;PS1<sup>dE9</sup>;BACE1<sup>-/-</sup> mice, but significant increases of full-length APP, BACE2 and  $\alpha$ -secretase derived APP-CTFs (X-CTF) were observed in these APP<sup>swe</sup>;PS1<sup>dE9</sup>;BACE1<sup>-/-</sup> animals; (B) A $\beta$  ELISA analysis (10  $\mu$ g each) and note that soluble A $\beta$  was not detected in APP<sup>swe</sup>;PS1<sup>dE9</sup>;BACE1<sup>-/-</sup> mice while a significant reduction of A $\beta$  (31%,  $n=6$ ,  $p<0.002$ , student t-test) was observed in APP<sup>swe</sup>;PS1<sup>dE9</sup>;BACE1<sup>+/-</sup> animals; and (C) mass spectrometric analysis (10  $\mu$ g each), note that A $\beta$  1-40 was not detected in APP<sup>swe</sup>;PS1<sup>dE9</sup>;BACE1<sup>-/-</sup> mice using Ciphergen ProteinChip system coated with 6E10 antibody. Sagittal brain sections (10  $\mu$ m) from 12 (panels D-I) month old APP<sup>swe</sup>;PS1<sup>dE9</sup>;BACE1<sup>+/+</sup> (panels D,F and H) and APP<sup>swe</sup>;PS1<sup>dE9</sup>;BACE1<sup>-/-</sup> (panels E, G and I) mice were subjected to Hirano silver staining (D and E), immunostaining with 4G8 (F and G), and thioflavin staining (H and I). Note that A $\beta$  deposition observed in APP<sup>swe</sup>;PS1<sup>dE9</sup>;BACE1<sup>+/+</sup> mice was

not detected in APP<sup>swe</sup>;PS1 $\Delta$ E9;BACE1<sup>-/-</sup> mice. Sagittal brain sections (10  $\mu$ m) from 20 month old APP<sup>swe</sup>;PS1 $\Delta$ E9;BACE1<sup>+/+</sup> (J) and APP<sup>swe</sup>;PS1 $\Delta$ E9;BACE1<sup>-/-</sup> (K) mice subject to Bielschowsky silver staining. No A $\beta$  deposition was observed in APP<sup>swe</sup>;PS1 $\Delta$ E9;BACE1<sup>-/-</sup> mice.

- [supplemental material](#) - S5. Deletion of BACE1 Prevents Neuropathology in a mouse model of A $\beta$  Amyloidosis. Glial responses, including astrocytosis, and microgliosis, often accompany A $\beta$  deposits in brains of individuals with AD as well as in mutant APP mice (Price and Sisodia, 1998). To confirm whether amyloid plaques are directly associated with neuritic damage, we examined the morphological changes of neurites in 12-month old APP<sup>swe</sup>;PS1 $\Delta$ E9;BACE1<sup>-/-</sup> mice as compared to age-matched littermate controls (Fig. S3A and S3D). Many enlarged neurites are present adjacent to the amyloid deposits in APP<sup>swe</sup>;PS1 $\Delta$ E9 mice (Fig. S3G), but there were no neuritic abnormalities in APP<sup>swe</sup>;PS1 $\Delta$ E9;BACE1<sup>-/-</sup> mice lacking amyloid aggregates (Fig. S3H). Consistent with our findings that BACE1 is present in presynaptic terminals, BACE1 immunoreactivities appeared in the dystrophic neurites surrounding the A $\beta$  deposits in APP<sup>swe</sup>;PS1 $\Delta$ E9 mice (Fig. S3I); these lesions were absent in APP<sup>swe</sup>;PS1 $\Delta$ E9;BACE1<sup>-/-</sup> animals (Fig. S3J). To confirm whether A $\beta$  or its aggregates trigger glial responses, we examined the extent of microgliosis and astrocytosis in brains of 12-month old mutant APP<sup>swe</sup>;PS1 $\Delta$ E9 mice with or without BACE1. Whereas APP<sup>swe</sup>;PS1 $\Delta$ E9 mice showed extensive astroglia (Fig. S3A), we found no evidence of astroglia in brains of APP<sup>swe</sup>;PS1 $\Delta$ E9;BACE1<sup>-/-</sup> mice (Fig. S3B) as compared to non-transgenic animals (Fig. S3C). In addition, the microglial activation, as revealed by the F4/80 immunostaining, observed in brains of APP<sup>swe</sup>;PS1 $\Delta$ E9 (Fig. S3D) was also prevented in APP<sup>swe</sup>;PS1 $\Delta$ E9;BACE1<sup>-/-</sup> mice (Fig. S3E). Thus, these results confirmed that the accumulation of A $\beta$  induces microgliosis and astrocytosis in the brains of transgenic mice and deletion of BACE1 prevents both of these glial inflammatory responses.
- [supplemental material](#) - S6B. Down regulation of BACE1 mRNA by shRNA. Lentiviral vectors expressing only GFP (PLL), GFP plus SH1-BACE1, or GFP plus SH2-BACE1 were transiently transfected into N2A cells. Three days later, total RNAs were extracted and 1  $\mu$ g of each sample was subjected to RT-PCR analysis with primers (5' CTGGTGAAGCAGACCCACATTC and 5' TGCGGAAGGACTGATTGGTGAC) for BACE1 that spanned exon 4 to exon 7. Actin was used as a positive control. Samples were analyzed after 25 cycles of PCR. S6C. Level of BACE1 protein is reduced by shRNA. Lentiviral vectors expressing only GFP (PLL), GFP plus SH1-BACE1, or GFP plus SH2-BACE1 were transiently transfected into N2A cells. Three days later, 50  $\mu$ g of protein lysates from cells transfected with PLL (lanes 3-5), SH1 (lanes 6-8) and SH2 (lanes 9-11) were subjected to protein blot analysis. Lanes 1 and 2 are positive (transfected hBACE) and negative (BACE1 null fibroblast cells) controls for the specificity of the BACE1 antibody. S6D. shRNA for BACE1 inhibits A $\beta$  secretion. Lentiviral vectors expressing only GFP (PLL), GFP plus SH1-BACE1, or GFP plus SH2-BACE1 were transiently transfected into N2A cells. 24 hours later, the cells were infected with adenoviral vector expressing APP<sup>swe</sup>. Three days after the transfection, the conditioned media were subjected to A $\beta$ 1-40 analysis by ELISA. SH1- and SH2-BACE1 inhibited secretion of A $\beta$ 1-40 by 73% and 72%, respectively.
