# Supplementary material
Source: PubMed Central journal article supplement (PMC2564291)
Supplement: NIHMS44739-supplement-S_Table_1.pdf [file NIHMS44739-supplement-S_Table_1.pdf]

Supplementary Table 1: Summary of memory deficits and emotional alterations in BACE1 knockout mice.

| Type of Deficit                  | Tasks                                          | Onset of the Deficit | Variables with significant differences                                                                             |
|----------------------------------|------------------------------------------------|----------------------|--------------------------------------------------------------------------------------------------------------------|
| Spatial Reference Memory         | Classic Version of the Morris Water maze (A-D) | 16-18 mo             | Time in Annulus 40 (in %) around the platform location (Probe trials, see D)                                       |
| Spatial Working Memory           | Radial Water maze (E-F)                        | 3 mo                 | Number of Errors to find the Platform in an allocentric version of the task (see Variable Start position, F)       |
|                                  | Spontaneous Alternation in Y maze (G)          | 3 mo                 | Percent of spontaneous alternations (see G)                                                                        |
| Emotional Deficits (Low anxiety) | Open Field (H,I)                               | 3 mo                 | Preference to the Central part of the Open Field (% of distance, see H; and number of visits to the Center, see I) |
|                                  | Plus Maze (J)                                  | 3 mo                 | Percent of visits to open arms of the Plus maze (J)                                                                |
